# Supplementary material for: Haploinsufficiency for BRCA1 leads to cell-type-specific genomic instability and premature senescence
Source: PubMed Central journal article supplement (PMC4491827; doi:10.1038/ncomms8505), 2015-06-24
Supplement: ncomms8505-s1.pdf [file ncomms8505-s1.pdf]

# Supplementary Figure 1

**A**

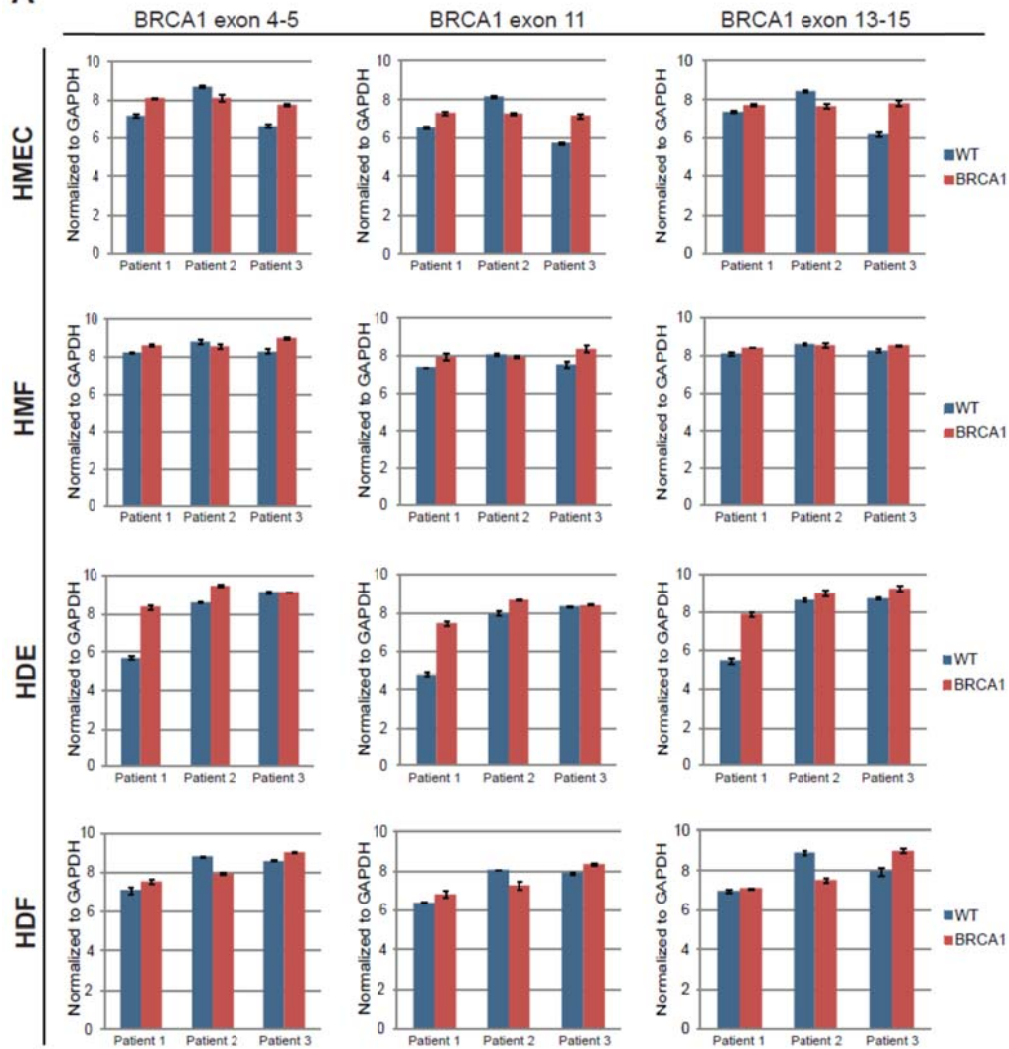

**B**

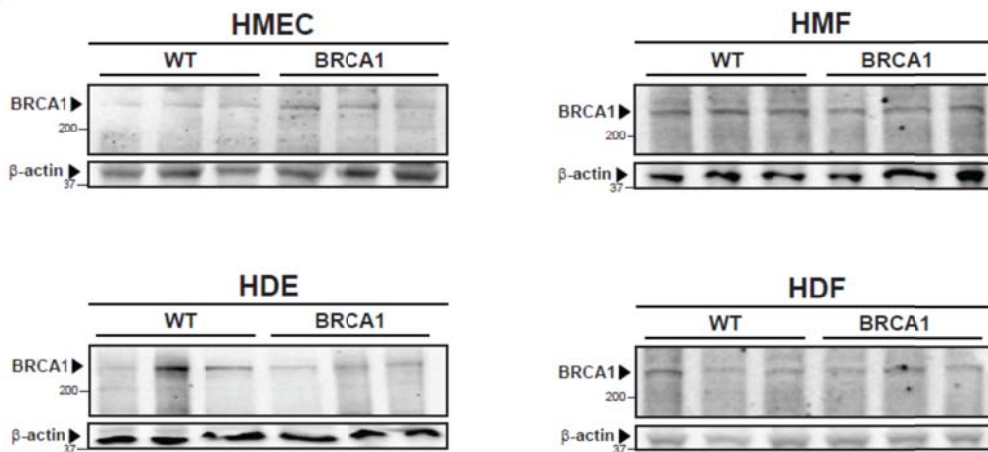

**Supplementary Figure 1: BRCA1 levels in HMECs, HDEs, HMFs, and HDF.** A) Analysis of full length BRCA1 mRNA transcript levels (exon 4-5, exon 11, exon 13-15) in WT and BRCA1 HMECs (n=3), HMFs (n=3), HDEs (n=3) and HDFs (n=3). The values were determined by qRT-PCR and normalized to GAPDH. B) BRCA1 protein levels in WT and BRCA1 HMECs (n=3), HMFs (n=3), HDEs (n=3) and HDFs (n=3) determined by western blot. Error bar = SE.

## Supplementary Figure 2

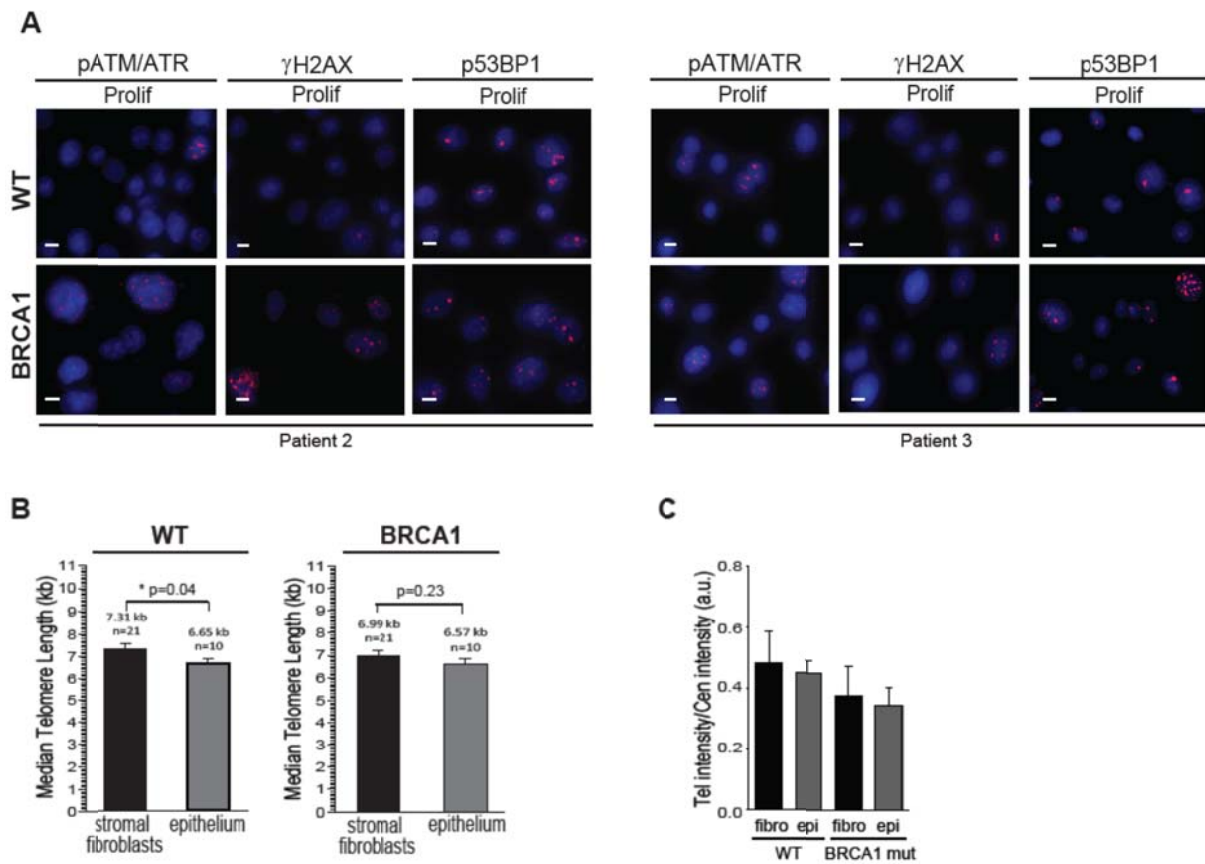

**Supplementary Figure 2: BRCA1mut/+ HMECs exhibit increased DDR and telomere dysfunction.** A) Representative images of immunofluorescence (IF) staining for phospho-ATM/ATR substrates,  $\gamma$ H2AX foci, p53BP1 foci in proliferating (Prolif) WT and BRCA1mut/+ HMECs from additional patient samples. B) Median telomere length (kb) determined by qFISH of all epithelial cells (luminal and myoepithelial in both ducts and lobules) as well as in stromal fibroblast from in WT (n=21) and BRCA1mut/+ (n=10) disease-free patient tissues. C) qFISH for a centromeric probe to control for any putative probe accessibility problem. Student's two-tailed t test was used to calculate p values. Error bar = SE. Scale bar = 10 $\mu$ m.

**Supplementary Figure 3**

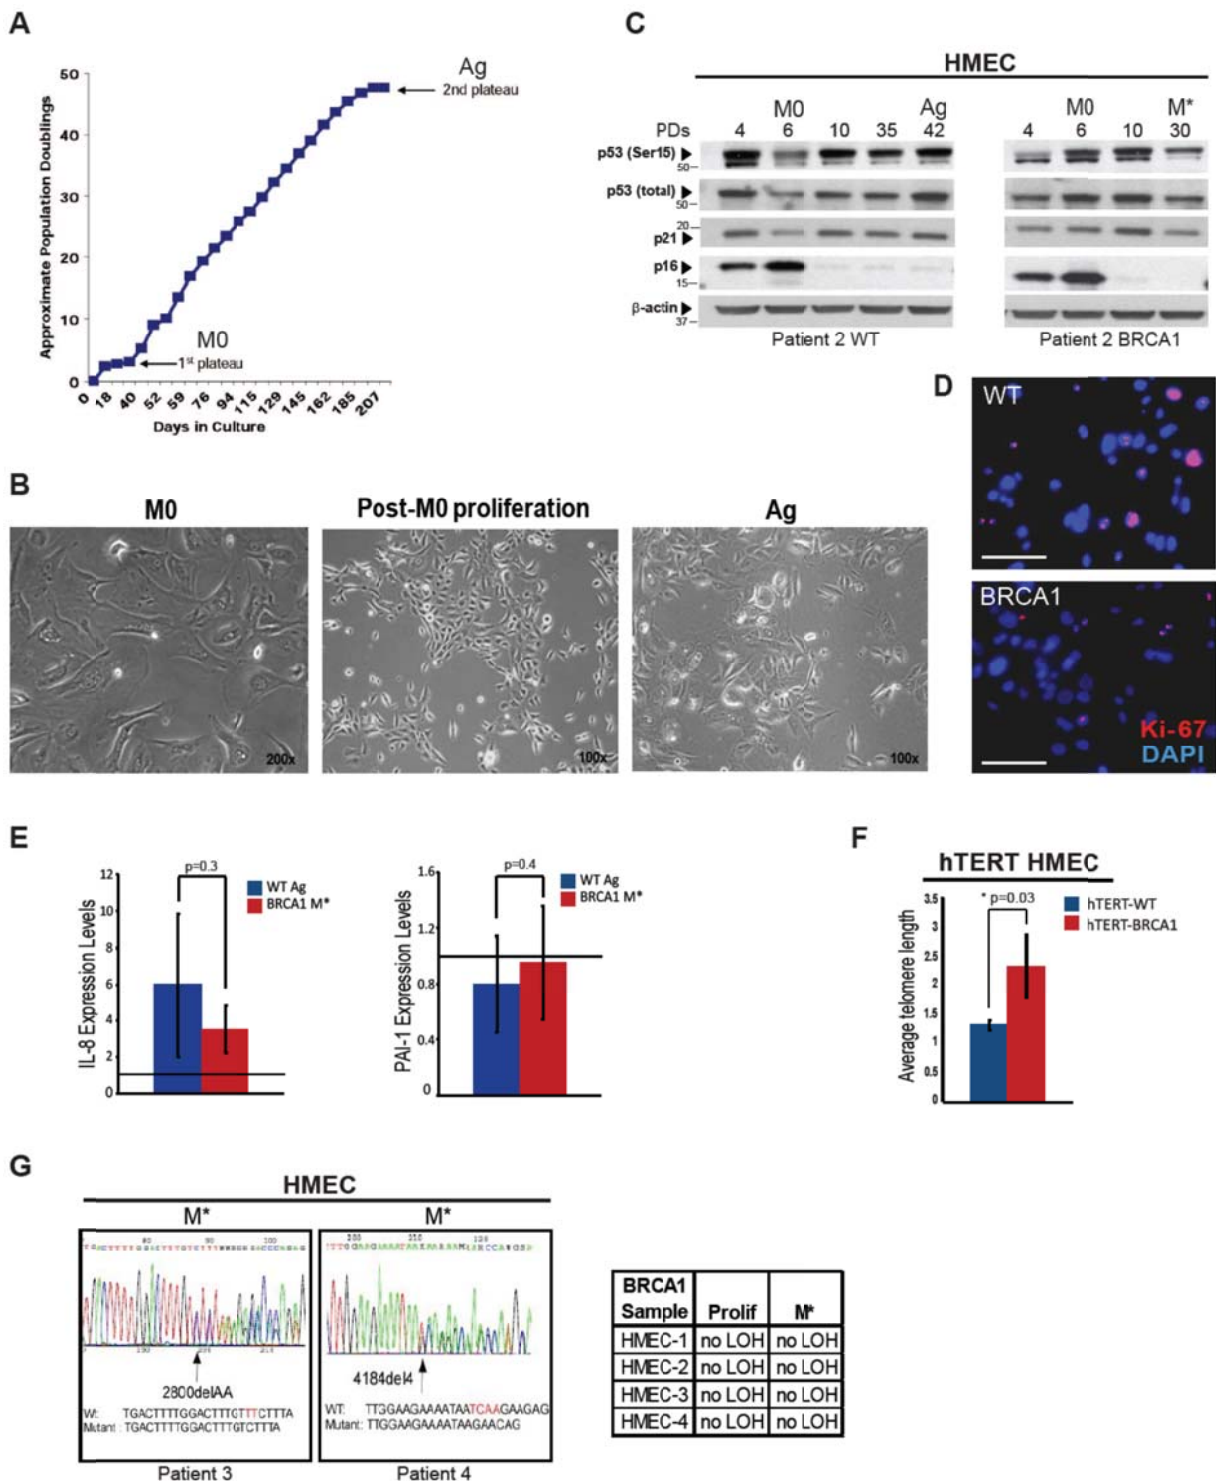

**Supplementary Figure 3: BRCA1mut/+ HMECs undergo premature senescence. A)** Representative growth curve of WT HMECs. M0 = Stasis, Ag = Agonescence **B)** Representative

phase-contrast brightfield images of WT HMECs in M0, post-M0 proliferation, and Ag. C) Western blot analysis of p16INK4a, total p53, p53 (Ser15), and p21 levels in WT and BRCA1mut/+ HMECs at indicated population doublings (PDs). D) Images of Ki67 positive cells determined by IF staining in Ag WT and M\* BRCA1mut/+ HMECs. E) mRNA levels of IL-8 and PAI-1 (SASFs) in Ag WT and M\* BRCA1mut/+ HMECs. The values were determined by qRT-PCR and normalized to proliferating cells (represented by line set at 1). F) Average telomere length in hTERT immortalized WT (n=3) and BRCA1mut/+ (n=3) HMECs. G) LOH analysis in M\* BRCA1mut/+ HMECs from additional patient samples. Table summarizes data from LOH analysis of proliferating and M\* BRCA1mut/+ HMECs. Student's two-tailed t test was used to calculate p values. Error bar = SE. Scale bar = 100 $\mu$ m.

### Supplementary Figure 4

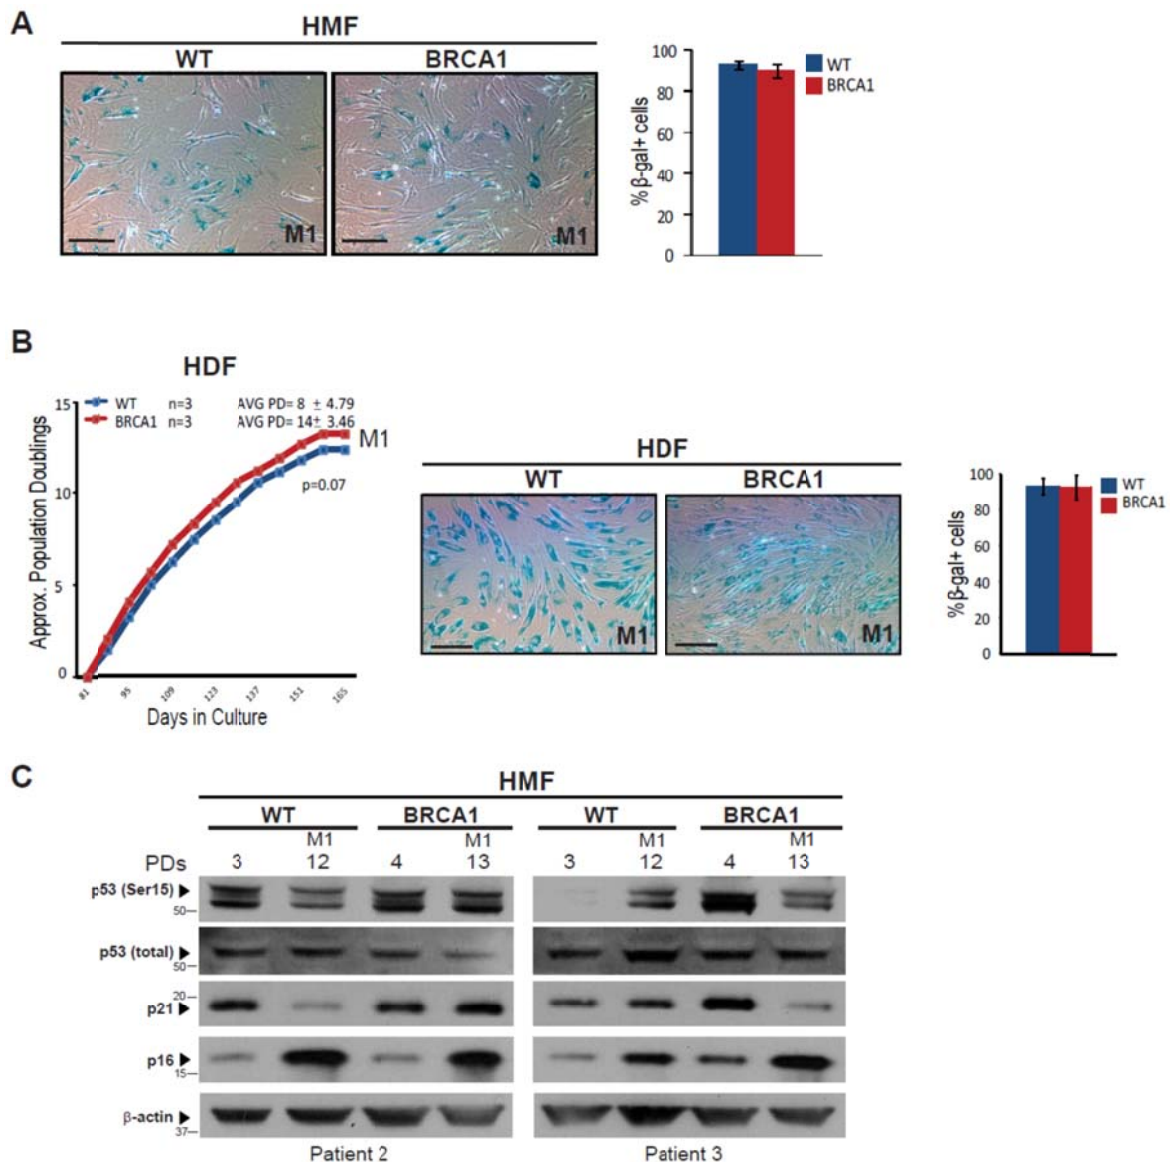

**D**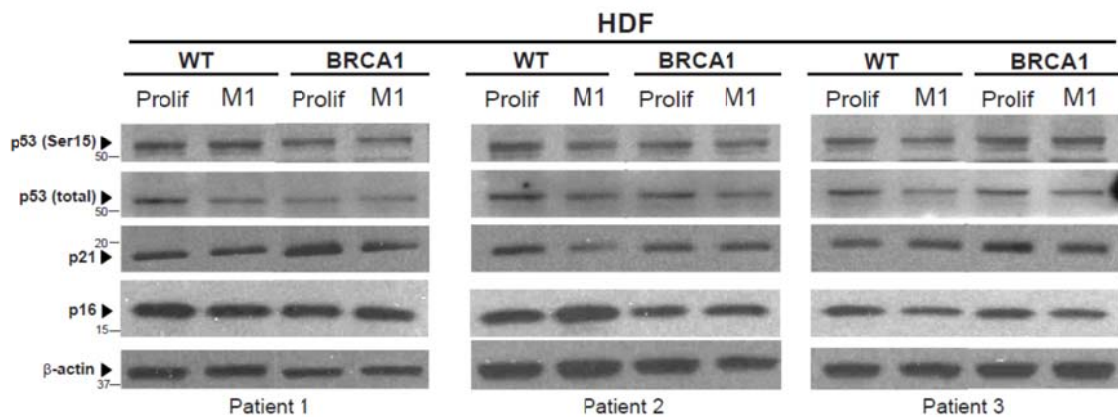

**Supplementary Figure 4: Premature senescence is cell type specific.** A) Brightfield images of SA-β-galactosidase staining and quantification of positive cells in M1 WT and BRCA1mut/+ HMFs. B) Representative growth curves of WT (n=3) and BRCA1mut/+(n=3) HDFs. Images and quantification of SA-β-galactosidase positive cells using β-galactosidase detection assay in senescent (M1) WT and BRCA1mut/+ HDFs. C) Western blot analysis of p16INK4a, total p53, p53 (Ser15), and p21 levels at indicated PDs in WT and BRCA1mut/+ HMFs from additional patient samples. D) Western blot analysis of p16INK4a, total p53, p53 (Ser15), and p21 levels in proliferating and M1 WT (n=3) and BRCA1mut/+ (n=3) HDFs. Student's two-tailed t test was used to calculate p values. Error bar = SE. Scale bar = 100μm.

**Supplementary Figure 5**

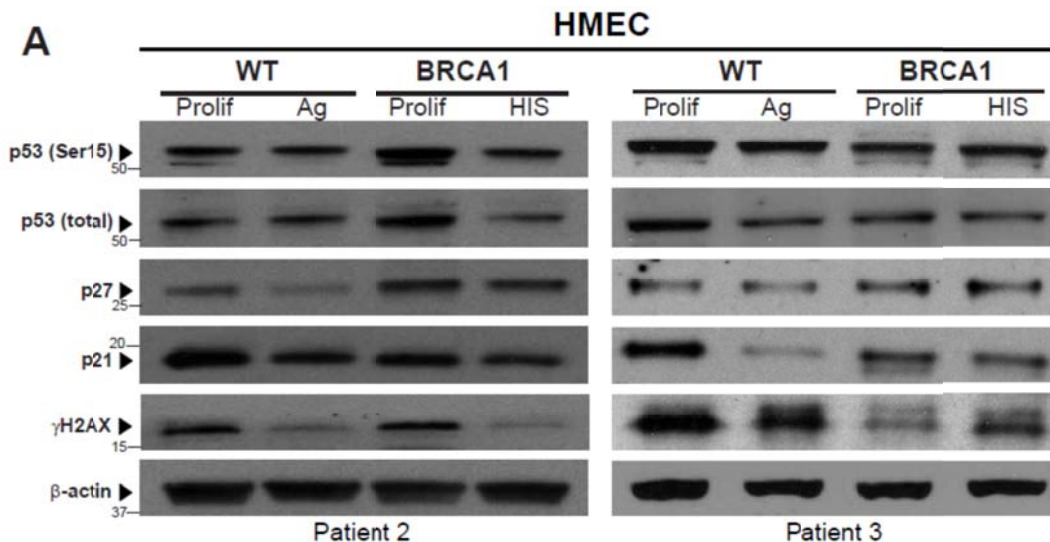

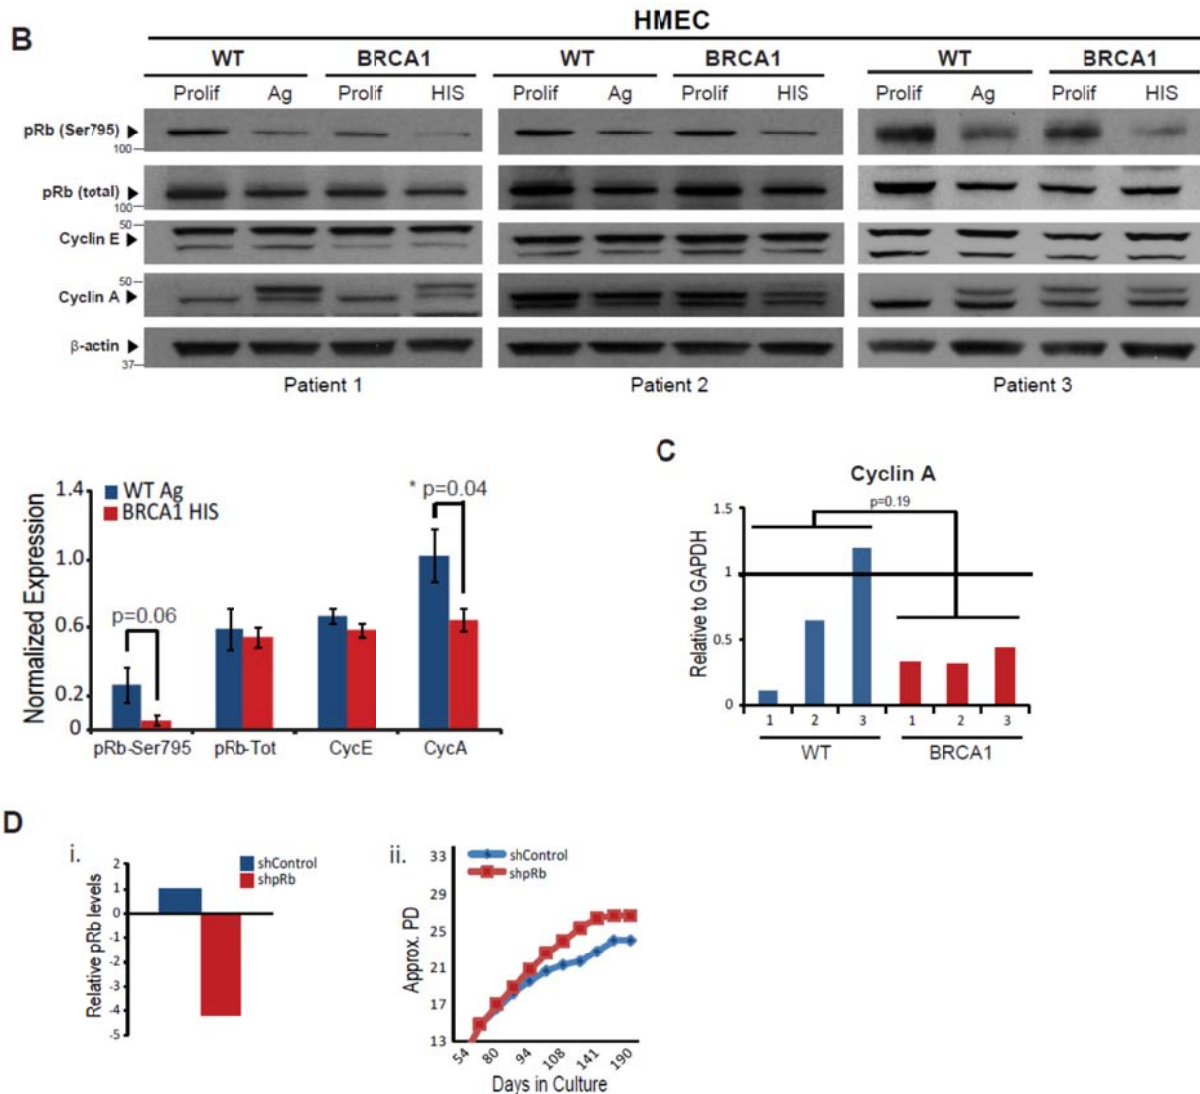

**Supplementary Figure 5: p53 and pRb signaling pathway analysis in additional HMECs.**

A) Western blot analysis of p53 (Ser15), total p53,  $\gamma$ H2AX, p21 and p27 levels in proliferating (Prolif) and agonescent/HIS (Ag/HIS) WT and BRCA1mut/+ HMECs from additional patient samples. B) Western blot analysis and quantification of phospho-pRb (Ser795), total pRb, Cyclin E and Cyclin A levels in proliferating (Prolif) and Ag/HIS WT and BRCA1mut/+ HMECs from additional patient samples. C) mRNA levels of Cyclin A in Ag WT and HIS BRCA1mut/+ HMECs. The values were determined by qRT-PCR and normalized to proliferating cells (represented by line set at 1). D) i. pRb knockdown in proliferating BRCA1mut/+ HMECs from Patient 2 (mRNA levels). ii. Growth curve of shScr (control) and shpRb BRCA1mut/+ HMECs from Patient 2. Student's two-tailed t test was used to calculate p values. Error bar = SE.

## Supplementary Figure 6

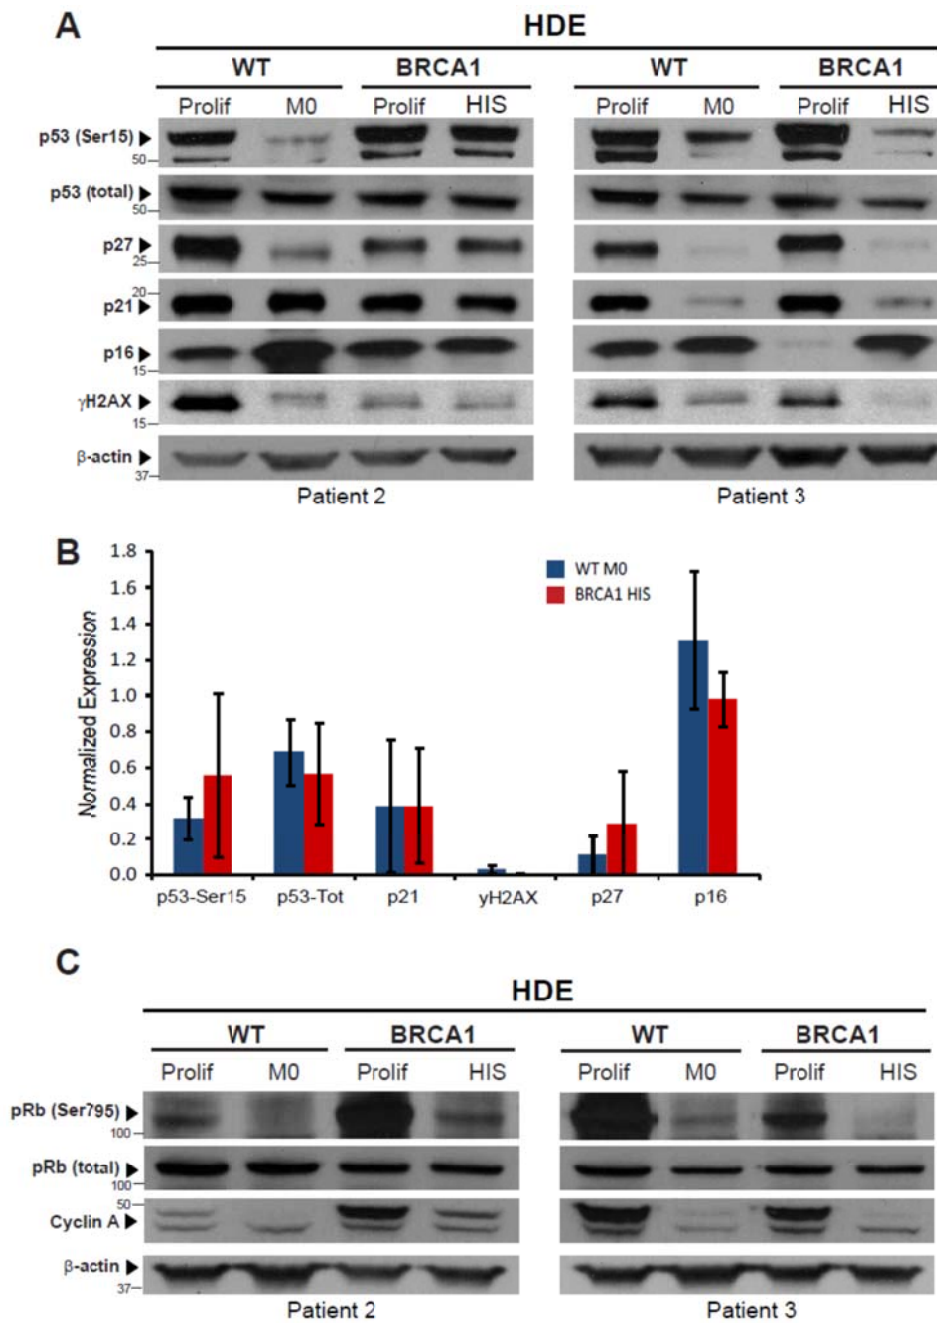

**Supplementary Figure 6: p53 and pRb signaling pathway analysis in additional HDEs.** A) Western blot analysis of p53 (Ser15), total p53,  $\gamma$ H2AX, p21, p27 and p16INK4a levels in proliferating (Prolif) and growth-arrested (M0/HIS) WT and BRCA1mut/+ HDEs from additional patient samples. B) Quantification of p53 (Ser15), total p53,  $\gamma$ H2AX, p21, p27 and p16 levels determined by western blotting in M0 WT (N=3) and HIS in BRCA1mut/+ (N=3) HDEs. C) Western blot analysis of phospho-pRb (Ser795), total pRb, and Cyclin A levels in

proliferating (Prolif) and M0/HIS WT and *BRCA1*<sup>mut/+</sup> HDEs from additional patient samples. Error bar = SE.

### Supplementary Figure 7

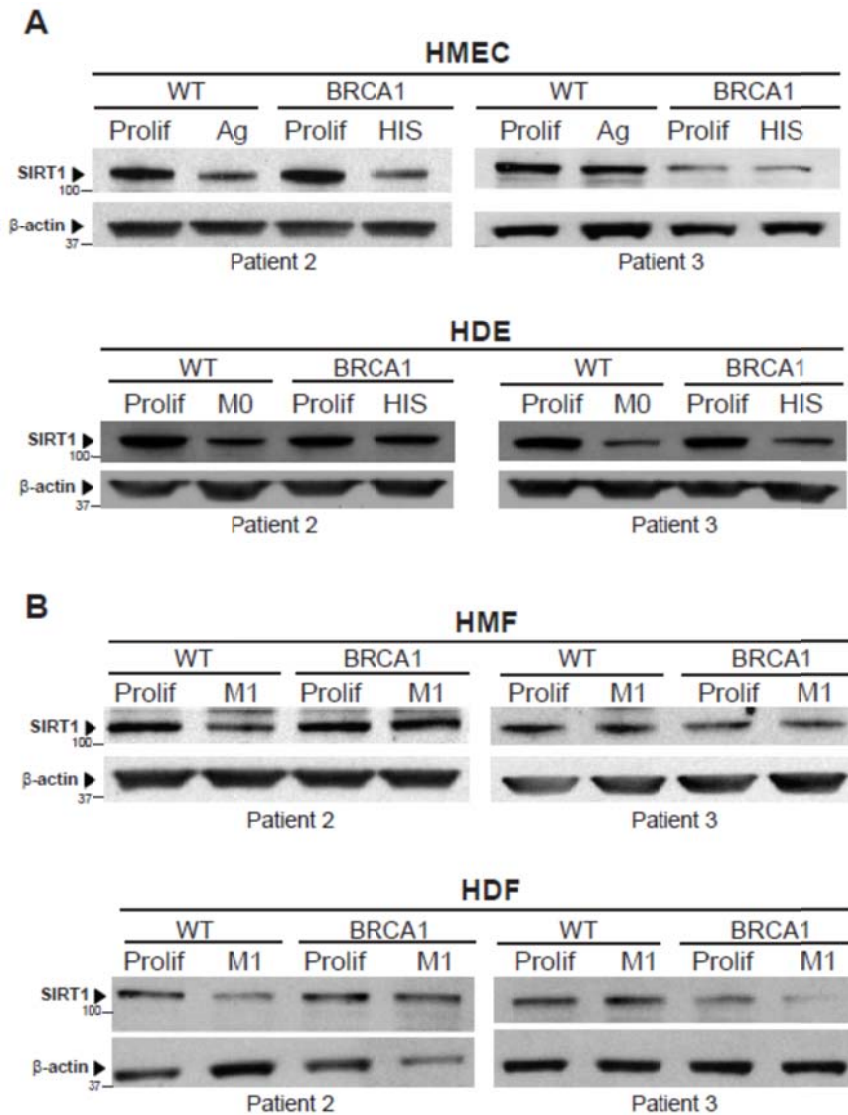

**Supplementary Figure 7: SIRT1 levels in additional patient samples.** A) Western blot analysis of SIRT1 levels in proliferating (Prolif) and Ag/HIS WT and *BRCA1*<sup>mut/+</sup> HMECs from additional patient samples. Western blot analysis of SIRT1 levels in proliferating (Prolif) and M0/HIS WT and *BRCA1*<sup>mut/+</sup> HDEs from additional patient samples. B) Western blot analysis of SIRT1 levels in proliferating (Prolif) and M1 WT and *BRCA1*<sup>mut/+</sup> HMF and HDFs from additional patient samples.



## Supplementary Figure 8

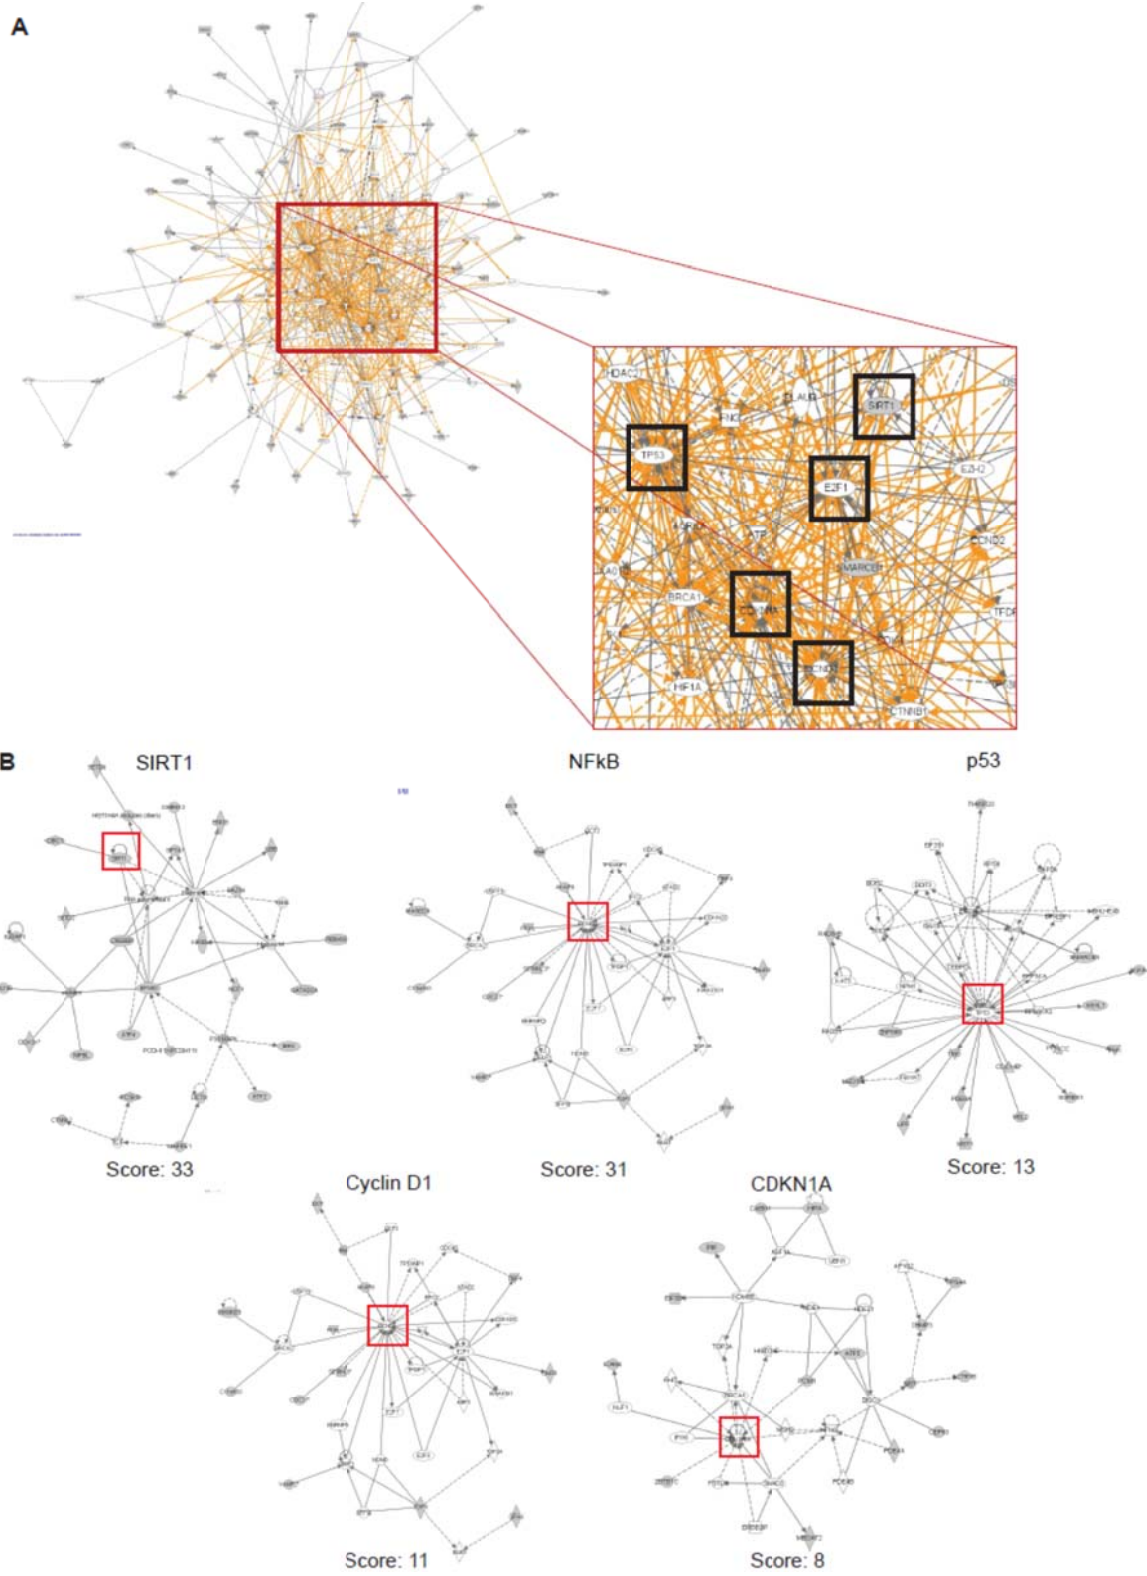

**Supplementary Figure 8: Ingenuity Pathways Analysis Summary.** A) Ingenuity Pathway Analysis identified 25 significant gene networks from differentially expressed genes from freshly isolated HMECs, as previously described (Proia et al. 2011, and as described in Materials and Methods). A gene network of 12 overlapping central nodes was constructed from this analysis. Genes colored in grey represent genes differentially expressed in BRCA1mut/+ tissues vs WT tissues. Nodes are displayed using various shapes that represent the functional class of the gene product. Edges with dashed lines show indirect interaction, while a continuous line represents direct interactions. B) The most significant gene networks identified involved central nodes in SIRT1, Rb, p53, and NFkappaB pathways.

**Supplementary Figure 9**

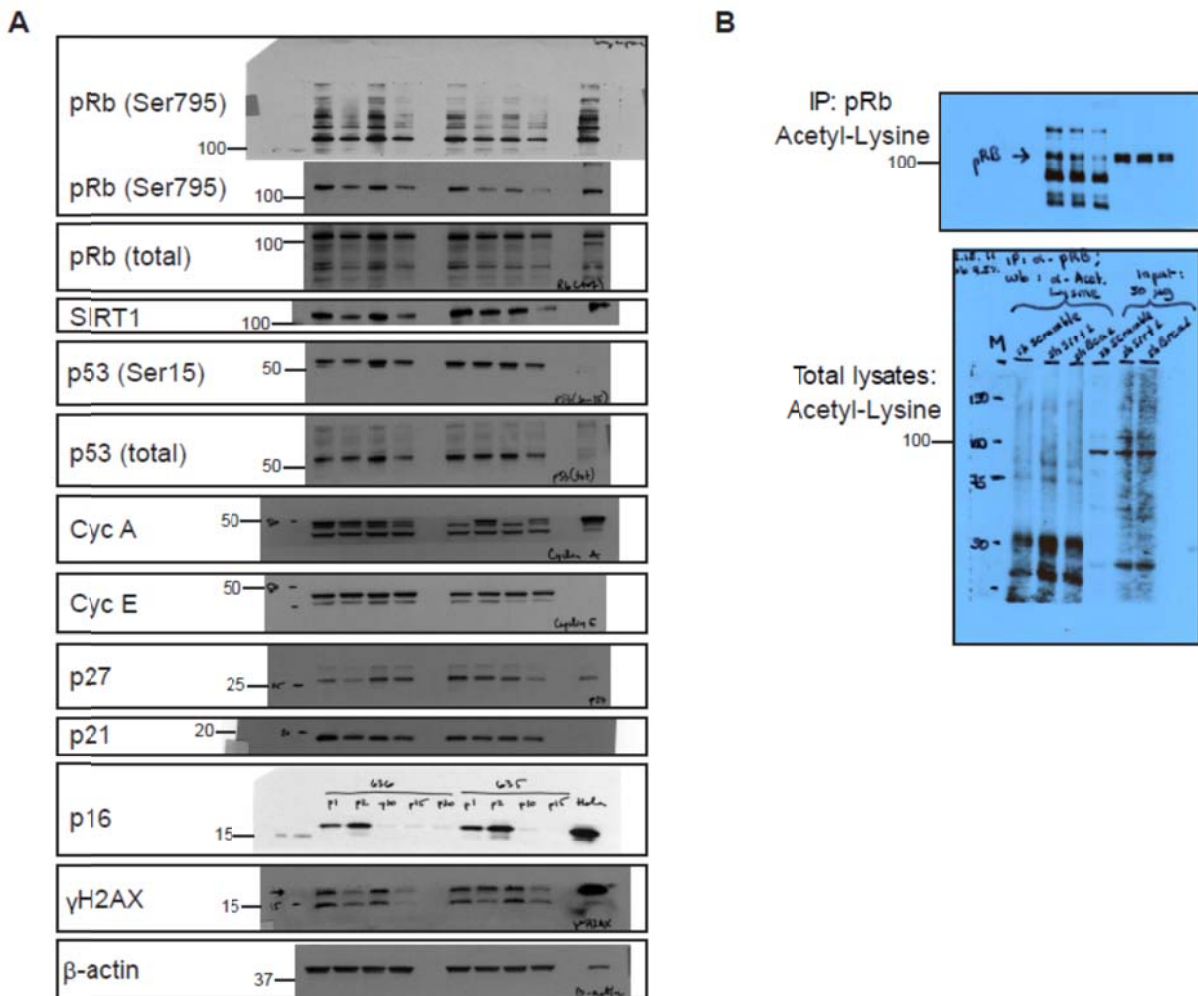

C

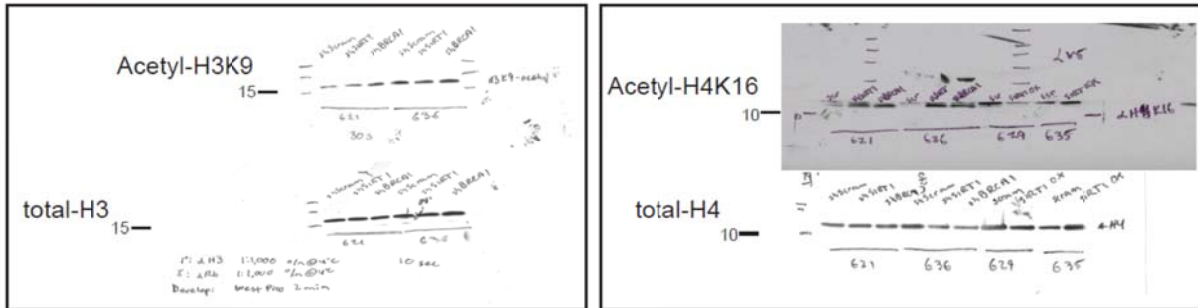

**Supplementary Figure 9: Uncropped scans of most relevant westernblots.** A) Most relevant blots for pRb (Ser795), pRb (total), SIRT1, p53 (Ser15), p53 (total), Cyclin A, Cyclin E, p27, p21, p16,  $\gamma$ H2AX,  $\beta$ -actin. B) pRB IP and total lysates probed with anti-Acetyl-Lysine blots. C) Acetyl-H3K9, total-H3, Acetyl-H4K16 and total-H4 blots.

**Supplementary Table 1**

**Supplemental Table 1. BRCA1 mutation status**

| Sample ID | Tissue Type                | Patient Age | Mutation (y/n) | Specific Mutation | Analysis                         |
|-----------|----------------------------|-------------|----------------|-------------------|----------------------------------|
| 616       | Proph.Mastec-Brcal         | 40          | yes            | exon13ins         | qFISH                            |
| 617       | Proph.Mastec-Brcal         | 53          | yes            | BRCA1 5385insC    | qFISH                            |
| 627       | Proph.Mastec-Brcal         | 53          | yes            | BRCA1 187 delAG   | qFISH                            |
| 628       | Proph.Mastec-Brcal         | 40          | yes            | BRCA1 5385 insC   | qFISH                            |
| 629       | Proph.Mastec-Brcal         | 44          | yes            | BRCA1 2800 delAA  | qFISH, LOH, GC, P/R, TELPCR, MET |
| 634       | Proph.Mastec-Brcal         | 39          | yes            | BRCA14184del4     | qFISH, LOH, TELPCR, MET          |
| 635       | Proph.Mastec-Brcal         | 35          | yes            | BRCA1 5385 insC   | qFISH, LOH, GC, P/R, TELPCR, MET |
| 642       | Proph.Mastec-Brcal         | 36          | yes            | BRCA1 187 delAG   | qFISH, LOH, GC, P/R, TELPCR, MET |
| 643       | Proph.Mastec-Brcal         | 47          | yes            | BRCA1C61G         | qFISH                            |
| 650       | Proph.Mastec-Brcal<br>Skin | 33          | yes            | BRCA1 943ins10    | LOH, GC, P/R, TELPCR             |
| 651       | Proph.Mastec-Brcal<br>Skin | 47          | yes            | delexon14intron14 | GC, P/R, TELPCR                  |
| 652       | Proph.Mastec-Brcal<br>Skin | 46          | yes            | BRCA1 4154delA    | LOH, GC, P/R, TELPCR             |

qFISH =in vivo telomere length, LOH= LOH analysis; GC= growth curves; P/R= protein and RNA analysis; TELPCR= telomere length PCR  
MET=metaphase spreads

## Supplementary Table 2

| Supplemental Table 2. GSEA analysis                          |               |            |            |            |            |
|--------------------------------------------------------------|---------------|------------|------------|------------|------------|
| Name of the pathway                                          | Gene Set SIZE | ES         | NES        | NOM p-val  | FDR q-val  |
| REACTOME_CELL_CYCLE_MITOTIC                                  | 261           | -0.1822147 | -3.333048  | 0          | 0          |
| REACTOME_E2F_MEDIATED_REGULATION_OF_DNA_REPLICATION          | 27            | -0.494275  | -3.0600283 | 0          | 2.95E-04   |
| REACTOME_G2_M_TRANSITION                                     | 72            | -0.2799382 | -2.8140864 | 0          | 0.00105462 |
| REACTOME_ACTIVATION_OF_ATR_IN_RESPONSE_TO_REPLICATION_STRESS | 33            | -0.402977  | -2.7753196 | 0          | 0.0012494  |
| REACTOME_CENTROSOME_MATURATION                               | 60            | -0.2964273 | -2.7085989 | 0          | 0.00188686 |
| REACTOME_E2F_TRANSCRIPTIONAL_TARGETS_AT_G1_S                 | 18            | -0.5194901 | -2.6574273 | 0          | 0.00293562 |
| REACTOME_G2_M_CHECKPOINTS                                    | 38            | -0.3559447 | -2.5365891 | 0          | 0.00567763 |
| REACTOME_ACTIVATION_OF_THE_PRE_REPLICATIVE_COMPLEX           | 27            | -0.3674328 | -2.2960405 | 0          | 0.01802512 |
| REACTOME_MITOTIC_PROMETAPHASE                                | 71            | -0.2303958 | -2.2924228 | 0          | 0.01653609 |
| BIOCARTA_MCM_PATHWAY                                         | 18            | -0.4495234 | -2.2790813 | 0          | 0.01604816 |
| KEGG_CELL_CYCLE                                              | 111           | -0.1723867 | -2.2049823 | 0          | 0.02107831 |
| REACTOME_MITOTIC_M_M_G1_PHASES                               | 134           | -0.1573849 | -2.1053176 | 0          | 0.03355169 |
| REACTOME_G1_S_TRANSITION                                     | 94            | -0.1818364 | -2.066683  | 0          | 0.03683207 |
| CHICAS_RB1_TARGETS_GROWING                                   | 221           | 0.27887425 | 4.7940974  | 0          | 0          |
| CHICAS_RB1_TARGETS_SENESCENT                                 | 495           | 0.16796239 | 4.2921963  | 0          | 0          |
| KAMMINGA_EZH2_TARGETS                                        | 39            | 0.41060108 | 3.059856   | 0          | 0          |
| V\$E2F1_Q3                                                   | 210           | 0.15255454 | 2.5253246  | 0          | 2.13E-04   |
| TANG_SENESCENT_TP53_TARGETS_DN                               | 52            | 0.2647142  | 2.2747254  | 0          | 0.00351118 |
| CHICAS_RB1_TARGETS_CONFLUENT                                 | 490           | 0.0820208  | 2.0581293  | 0.00194932 | 0.01106058 |
| KUMAMOTO_RESPONSE_TO_NUTLIN_3A_DN                            | 10            | 0.5047875  | 1.9616181  | 0.0020202  | 0.01498721 |
| REACTOME_DNA_STRAND_ELONGATION                               | 27            | -0.2954367 | -1.8379503 | 0.00567108 | 0.08739737 |
| REACTOME_DNA_REPAIR                                          | 93            | -0.1684125 | -1.8715832 | 0.01372549 | 0.07727332 |
| REACTOME_DNA_REPLICATION_PRE_INITIATION                      | 72            | -0.1729187 | -1.751833  | 0.01724138 | 0.1213078  |
| KEGG_HOMOLOGOUS_RECOMBINATION                                | 27            | -0.2745898 | -1.6734208 | 0.02574257 | 0.15364626 |
| REACTOME_SYNTHESIS_OF_DNA                                    | 84            | -0.1630917 | -1.7996148 | 0.02574257 | 0.09985348 |
| REACTOME_M_G1_TRANSITION                                     | 59            | -0.1824439 | -1.6782709 | 0.0308642  | 0.15378681 |
| REACTOME_CELL_CYCLE_CHECKPOINTS                              | 99            | -0.1440138 | -1.663237  | 0.03571429 | 0.15834156 |
| CHICAS_RB1_TARGETS_LOW_SERUM                                 | 76            | 0.16329645 | 1.6577407  | 0.04268293 | 0.07548876 |
| REACTOME_EXTENSION_OF_TELOMERES                              | 24            | -0.2721803 | -1.5520241 | 0.04930966 | 0.23302579 |

## Supplementary Table 3

| shRNA sequences: |                                                                   |
|------------------|-------------------------------------------------------------------|
| shBRCA1#1:       | 5'-CCGGGAGTATGCAAACAGCTATAATCTCGAGATTATAGCTGTTTGCATACTCTTTTTIG-3' |
| shBRCA1#2:       | 5'-CCGGACTGATACTGCTGGGTATAATCTCGAGATTATACCCAGCAGTATCAGTTTTTIG-3'  |
| shSIRT1#1:       | 5'-CCGGGAGACTGTGATGTCATAATTACTCGAGTAATTATGACATCACAGTCTCTTTTTIG-3' |
| shSIRT1#2:       | 5'-CCGGCAGGTCAAGGGATGGTATTTACTCGAGTAAATACCATCCCTTGACCTGTTTTTIG-3' |
| shpRb#1:         | 5'-CCGGCCACATTATTTCTAGTCCAAACTCGAGTTTGGACTAGAAATAATGTGGTTTTTIG-3' |
| shpRb#2:         | 5'-CCGGCAGAGATCGTGTATTGAGATTCTCGAGAATCTCAATACACGATCTCTGTTTTTIG-3' |
